# Supplementary material for: Molecular partition coefficient from machine learning with polarization and entropy embedded atom-centered symmetry functions
Source: Royal Society of Chemistry journal article supplement (doi:10.1039/d2cp02648a), 2022-01-01
Supplement: d2cp02648a1.pdf [file d2cp02648a1.pdf]

# **Molecular Partition Coefficient from Machine Learning with Polarization and Entropy Embedded Atom-Centered Symmetry Functions**

Qiang Zhu, Qingqing Jia, Ziteng Liu, Yang Ge, Xu Gu, Ziyi Cui, Mengting Fan,  
and Jing Ma\*

*Key Laboratory of Mesoscopic Chemistry of Ministry of Education Institute of Theoretical  
and Computational Chemistry School of Chemistry and Chemical Engineering, Nanjing  
University, Nanjing, 210023, P. R. China*

E-mail: majing@nju.edu.cn

# Contents

|     |                                                                                                                |     |
|-----|----------------------------------------------------------------------------------------------------------------|-----|
| S1  | Details of 100 selected descriptors                                                                            | S3  |
| S2  | Homemade dataset                                                                                               | S6  |
| S3  | Summary of molecular entropy                                                                                   | S8  |
| S4  | Atom-centered Symmetry Functions (ACSFs)                                                                       | S9  |
| S5  | Grid search of optimal parameters                                                                              | S10 |
| S6  | Distribution of chemical elements and partition coefficient among 6 datasets                                   | S12 |
| S7  | Computational Details                                                                                          | S13 |
|     | S7.1 Molecular Dynamics Simulations . . . . .                                                                  | S13 |
|     | S7.2 Quantum Mechanisms . . . . .                                                                              | S14 |
| S8  | Evaluation metrics                                                                                             | S15 |
| S9  | Principle Component Analysis                                                                                   | S16 |
| S10 | Generation of Standard Descriptors                                                                             | S17 |
| S11 | Feature selection                                                                                              | S18 |
| S12 | An illustration of 5-5 neural network                                                                          | S20 |
| S13 | Distribution of contribution from 4 distinct elements with different environment over datasets Star & Non-Star | S22 |
|     | References                                                                                                     | S27 |

# S1 Details of 100 selected descriptors

Table S1: 100 descriptors extracted from RDKit

| No. | Name                | Description                                                                                                                                                     |
|-----|---------------------|-----------------------------------------------------------------------------------------------------------------------------------------------------------------|
| 0   | MaxEStateIndex      | N/A                                                                                                                                                             |
| 1   | MinEStateIndex      | N/A                                                                                                                                                             |
| 2   | MaxAbsEStateIndex   | N/A                                                                                                                                                             |
| 3   | MinAbsEStateIndex   | N/A                                                                                                                                                             |
| 4   | qed                 | Calculate the weighted sum of ADS mapped properties                                                                                                             |
| 5   | MolWt               | The average molecular weight of the molecule                                                                                                                    |
| 6   | HeavyAtomMolWt      | The average molecular weight of the molecule ignoring hydrogens                                                                                                 |
| 7   | ExactMolWt          | The exact molecular weight of the molecule                                                                                                                      |
| 8   | NumValenceElectrons | The number of valence electrons the molecule has                                                                                                                |
| 9   | MaxPartialCharge    | N/A                                                                                                                                                             |
| 10  | MinPartialCharge    | N/A                                                                                                                                                             |
| 11  | MaxAbsPartialCharge | N/A                                                                                                                                                             |
| 12  | MinAbsPartialCharge | N/A                                                                                                                                                             |
| 13  | FpDensityMorgan1    | N/A                                                                                                                                                             |
| 14  | FpDensityMorgan2    | N/A                                                                                                                                                             |
| 15  | FpDensityMorgan3    | N/A                                                                                                                                                             |
| 16  | BalabanJ            | Calculate Balaban's J value for a molecule                                                                                                                      |
| 17  | BertzCT             | A topological index meant to quantify "complexity" of molecules.                                                                                                |
| 18  | Chi0                | From equations (1),(9) and (10) of Rev. Comp. Chem. vol 2, 367-422, (1991)                                                                                      |
| 19  | Chi0n               | N/A                                                                                                                                                             |
| 20  | Chi0v               | N/A                                                                                                                                                             |
| 21  | Chi1                | From equations (1),(11) and (12) of Rev. Comp. Chem. vol 2, 367-422, (1991)                                                                                     |
| 22  | Chi1n               | N/A                                                                                                                                                             |
| 23  | Chi1v               | N/A                                                                                                                                                             |
| 24  | Chi2n               | N/A                                                                                                                                                             |
| 25  | Chi2v               | N/A                                                                                                                                                             |
| 26  | Chi3n               | N/A                                                                                                                                                             |
| 27  | Chi3v               | N/A                                                                                                                                                             |
| 28  | Chi4n               | N/A                                                                                                                                                             |
| 29  | Chi4v               | N/A                                                                                                                                                             |
| 30  | HallKierAlpha       | N/A                                                                                                                                                             |
| 31  | Ipc                 | This returns the information content of the coefficients of the characteristic polynomial of the adjacency matrix of a hydrogen-suppressed graph of a molecule. |
| 32  | Kappa1              | N/A                                                                                                                                                             |
| 33  | Kappa2              | N/A                                                                                                                                                             |
| 34  | Kappa3              | N/A                                                                                                                                                             |
| 35  | LabuteASA           | N/A                                                                                                                                                             |
| 36  | PEOE_VSA1           | MOE Charge VSA Descriptor 1 (-inf < x < -0.30)                                                                                                                  |
| 37  | PEOE_VSA10          | MOE Charge VSA Descriptor 10 ( 0.10 <= x < 0.15)                                                                                                                |
| 38  | PEOE_VSA11          | MOE Charge VSA Descriptor 11 ( 0.15 <= x < 0.20)                                                                                                                |
| 39  | PEOE_VSA12          | MOE Charge VSA Descriptor 12 ( 0.20 <= x < 0.25)                                                                                                                |
| 40  | PEOE_VSA13          | MOE Charge VSA Descriptor 13 ( 0.25 <= x < 0.30)                                                                                                                |
| 41  | PEOE_VSA14          | MOE Charge VSA Descriptor 14 ( 0.30 <= x < inf)                                                                                                                 |
| 42  | PEOE_VSA2           | MOE Charge VSA Descriptor 2 (-0.30 <= x < -0.25)                                                                                                                |
| 43  | PEOE_VSA3           | MOE Charge VSA Descriptor 3 (-0.25 <= x < -0.20)                                                                                                                |
| 44  | PEOE_VSA4           | MOE Charge VSA Descriptor 4 (-0.20 <= x < -0.15)                                                                                                                |
| 45  | PEOE_VSA5           | MOE Charge VSA Descriptor 5 (-0.15 <= x < -0.10)                                                                                                                |
| 46  | PEOE_VSA6           | MOE Charge VSA Descriptor 6 (-0.10 <= x < -0.05)                                                                                                                |
| 47  | PEOE_VSA7           | MOE Charge VSA Descriptor 7 (-0.05 <= x < 0.00)                                                                                                                 |
| 48  | PEOE_VSA8           | MOE Charge VSA Descriptor 8 ( 0.00 <= x < 0.05)                                                                                                                 |

| No. | Name                     | Description                                                                                                                                              |
|-----|--------------------------|----------------------------------------------------------------------------------------------------------------------------------------------------------|
| 49  | PEOE_VSA9                | MOE Charge VSA Descriptor 9 ( 0.05 <= x < 0.10)                                                                                                          |
| 50  | SMR_VSA1                 | MOE MR VSA Descriptor 1 (-inf < x < 1.29)                                                                                                                |
| 51  | SMR_VSA10                | MOE MR VSA Descriptor 10 ( 4.00 <= x < inf)                                                                                                              |
| 52  | SMR_VSA2                 | MOE MR VSA Descriptor 2 ( 1.29 <= x < 1.82)                                                                                                              |
| 53  | SMR_VSA3                 | MOE MR VSA Descriptor 3 ( 1.82 <= x < 2.24)                                                                                                              |
| 54  | SMR_VSA4                 | MOE MR VSA Descriptor 4 ( 2.24 <= x < 2.45)                                                                                                              |
| 55  | SMR_VSA5                 | MOE MR VSA Descriptor 5 ( 2.45 <= x < 2.75)                                                                                                              |
| 56  | SMR_VSA6                 | MOE MR VSA Descriptor 6 ( 2.75 <= x < 3.05)                                                                                                              |
| 57  | SMR_VSA7                 | MOE MR VSA Descriptor 7 ( 3.05 <= x < 3.63)                                                                                                              |
| 58  | SMR_VSA8                 | MOE MR VSA Descriptor 8 ( 3.63 <= x < 3.80)                                                                                                              |
| 59  | SMR_VSA9                 | MOE MR VSA Descriptor 9 ( 3.80 <= x < 4.00)                                                                                                              |
| 60  | TPSA                     | N/A                                                                                                                                                      |
| 61  | EState_VSA1              | EState VSA Descriptor 1 (-inf < x < -0.39)                                                                                                               |
| 62  | EState_VSA10             | EState VSA Descriptor 10 ( 9.17 <= x < 15.00)                                                                                                            |
| 63  | EState_VSA11             | EState VSA Descriptor 11 ( 15.00 <= x < inf)                                                                                                             |
| 64  | EState_VSA2              | EState VSA Descriptor 2 ( -0.39 <= x < 0.29)                                                                                                             |
| 65  | EState_VSA3              | EState VSA Descriptor 3 ( 0.29 <= x < 0.72)                                                                                                              |
| 66  | EState_VSA4              | EState VSA Descriptor 4 ( 0.72 <= x < 1.17)                                                                                                              |
| 67  | EState_VSA5              | EState VSA Descriptor 5 ( 1.17 <= x < 1.54)                                                                                                              |
| 68  | EState_VSA6              | EState VSA Descriptor 6 ( 1.54 <= x < 1.81)                                                                                                              |
| 69  | EState_VSA7              | EState VSA Descriptor 7 ( 1.81 <= x < 2.05)                                                                                                              |
| 70  | EState_VSA8              | EState VSA Descriptor 8 ( 2.05 <= x < 4.69)                                                                                                              |
| 71  | EState_VSA9              | EState VSA Descriptor 9 ( 4.69 <= x < 9.17)                                                                                                              |
| 72  | VSA_EState1              | VSA EState Descriptor 1 (-inf < x < 4.78)                                                                                                                |
| 73  | VSA_EState10             | VSA EState Descriptor 10 ( 11.00 <= x < inf)                                                                                                             |
| 74  | VSA_EState2              | VSA EState Descriptor 2 ( 4.78 <= x < 5.00)                                                                                                              |
| 75  | VSA_EState3              | VSA EState Descriptor 3 ( 5.00 <= x < 5.41)                                                                                                              |
| 76  | VSA_EState4              | VSA EState Descriptor 4 ( 5.41 <= x < 5.74)                                                                                                              |
| 77  | VSA_EState5              | VSA EState Descriptor 5 ( 5.74 <= x < 6.00)                                                                                                              |
| 78  | VSA_EState6              | VSA EState Descriptor 6 ( 6.00 <= x < 6.07)                                                                                                              |
| 79  | VSA_EState7              | VSA EState Descriptor 7 ( 6.07 <= x < 6.45)                                                                                                              |
| 80  | VSA_EState8              | VSA EState Descriptor 8 ( 6.45 <= x < 7.00)                                                                                                              |
| 81  | VSA_EState9              | VSA EState Descriptor 9 ( 7.00 <= x < 11.00)                                                                                                             |
| 82  | FractionCSP3             | CalcFractionCSP3( (Mol)mol )-> float : returns the fraction of C atoms that are SP3 hybridized                                                           |
| 83  | HeavyAtomCount           | Number of heavy atoms a molecule.                                                                                                                        |
| 84  | NHOHCount                | Number of NHs or OHs                                                                                                                                     |
| 85  | NOCCount                 | Number of Nitrogens and Oxygens                                                                                                                          |
| 86  | NumAliphaticCarbocycles  | CalcNumAliphaticCarbocycles( (Mol)mol )-> int : returns the number of aliphatic (containing at least one non-aromatic bond) carbocycles for a molecule   |
| 87  | NumAliphaticHeterocycles | CalcNumAliphaticHeterocycles( (Mol)mol )-> int : returns the number of aliphatic (containing at least one non-aromatic bond) heterocycles for a molecule |
| 88  | NumAliphaticRings        | CalcNumAliphaticRings( (Mol)mol )-> int : returns the number of aliphatic (containing at least one non-aromatic bond) rings for a molecule               |
| 89  | NumAromaticCarbocycles   | CalcNumAromaticCarbocycles( (Mol)mol )-> int : returns the number of aromatic carbocycles for a molecule                                                 |
| 90  | NumAromaticHeterocycles  | CalcNumAromaticHeterocycles( (Mol)mol )-> int : returns the number of aromatic heterocycles for a molecule                                               |
| 91  | NumAromaticRings         | CalcNumAromaticRings( (Mol)mol )-> int : returns the number of aromatic rings for a molecule                                                             |
| 92  | NumHAcceptors            | Number of Hydrogen Bond Acceptors                                                                                                                        |
| 93  | NumHDonors               | Number of Hydrogen Bond Donors                                                                                                                           |
| 94  | NumHeteroatoms           | Number of Heteroatoms                                                                                                                                    |
| 95  | NumRotatableBonds        | Number of Rotatable Bonds                                                                                                                                |
| 96  | NumSaturatedCarbocycles  | CalcNumSaturatedCarbocycles( (Mol)mol )-> int : returns the number of saturated carbocycles for a molecule                                               |

---

| No. | Name                     | Description                                                                                                  |
|-----|--------------------------|--------------------------------------------------------------------------------------------------------------|
| 97  | NumSaturatedHeterocycles | CalcNumSaturatedHeterocycles( (Mol)mol )-> int : returns the number of saturated heterocycles for a molecule |
| 98  | NumSaturatedRings        | CalcNumSaturatedRings( (Mol)mol )-> int : returns the number of saturated rings for a molecule               |
| 99  | RingCount                | N/A                                                                                                          |

---

## S2 Homemade dataset

Table S2: Collection of molecules of datasets *n*-carboxylic acids and Solv-54.

| Name                           | SMILES                              | $\log P_{exp}$ | $(q-ACSFs)_{conf}$ |
|--------------------------------|-------------------------------------|----------------|--------------------|
| <i>n</i> -carboxylic acids     |                                     |                |                    |
| acetic acid                    | <chem>CC(=O)O</chem>                | -0.17          | -0.27              |
| propionic acid                 | <chem>CCC(=O)O</chem>               | 0.33           | 0.26               |
| butyric acid                   | <chem>CCCC(=O)O</chem>              | 0.79           | 0.73               |
| valeric acid                   | <chem>CCCCC(=O)O</chem>             | 1.39           | 1.25               |
| caproic acid                   | <chem>CCCCCC(=O)O</chem>            | 1.92           | 1.79               |
| enanthic acid                  | <chem>CCCCCCC(=O)O</chem>           | 2.42           | 2.38               |
| caprylic acid                  | <chem>CCCCCCCC(=O)O</chem>          | 3.05           | 2.92               |
| pelargonic acid                | <chem>CCCCCCCCC(=O)O</chem>         | 3.42           | 3.36               |
| capric acid                    | <chem>CCCCCCCCC(=O)O</chem>         | 4.09           | 3.88               |
| undecanoic acid                | <chem>CCCCCCCCCCC(=O)O</chem>       | 4.42           | 4.40               |
| lauric acid                    | <chem>CCCCCCCCCCCC(=O)O</chem>      | 4.60           | 4.76               |
| tridecanoic acid               | <chem>CCCCCCCCCCCCC(=O)O</chem>     | 5.49           | 5.57               |
| myristic acid                  | <chem>CCCCCCCCCCCCC(=O)O</chem>     | 6.11           | 6.12               |
| Solv-54                        |                                     |                |                    |
| butanal                        | <chem>CCCC=O</chem>                 | 0.88           | 0.80               |
| 5-Nonanone                     | <chem>CCCCC(=O)CCCC</chem>          | 2.88           | 3.01               |
| hexadecanoic acid              | <chem>CCCCCCCCCCCCCCCC(=O)O</chem>  | 7.17           | 6.96               |
| octadecanoic acid              | <chem>CCCCCCCCCCCCCCCCC(=O)O</chem> | 8.35           | 8.12               |
| methane                        | <chem>C</chem>                      | 1.09           | 0.97               |
| ethane                         | <chem>CC</chem>                     | 1.81           | 1.52               |
| propane                        | <chem>CCC</chem>                    | 2.36           | 2.07               |
| butane                         | <chem>CCCC</chem>                   | 2.89           | 2.61               |
| pentane                        | <chem>CCCCC</chem>                  | 3.26           | 3.14               |
| 2-methyl-butane                | <chem>CCC(C)C</chem>                | 2.72           | 3.16               |
| hexane                         | <chem>CCCCCC</chem>                 | 3.90           | 3.67               |
| cyclohexane                    | <chem>C1CCCCC1</chem>               | 3.44           | 3.31               |
| heptane                        | <chem>CCCCCCC</chem>                | 4.66           | 4.19               |
| octane                         | <chem>CCCCCCCC</chem>               | 4.78           | 4.73               |
| oct-1-ene                      | <chem>CCCCCCC=C</chem>              | 4.57           | 4.34               |
| nonane                         | <chem>CCCCCCCCC</chem>              | 5.45           | 5.27               |
| decane                         | <chem>CCCCCCCCC</chem>              | 5.01           | 5.79               |
| dodecane                       | <chem>CCCCCCCCCCCC</chem>           | 6.10           | 6.86               |
| tetradecane                    | <chem>CCCCCCCCCCCCC</chem>          | 7.20           | 7.90               |
| hexadecane                     | <chem>CCCCCCCCCCCCCCC</chem>        | 8.2            | 8.95               |
| octadecane                     | <chem>CCCCCCCCCCCCCCCC</chem>       | 9.32           | 10.02              |
| 3,6,9-trioxa-undecan-1,11-diol | <chem>OCCOCCOCCOCCO</chem>          | -2.02          | -1.35              |
| ethane-1,2-diol                | <chem>OCCO</chem>                   | -1.36          | -1.40              |
| butane-1,4-diol                | <chem>OCCCCO</chem>                 | -0.83          | -0.45              |
| methanol                       | <chem>CO</chem>                     | -0.69          | -0.64              |
| cyclopentanol                  | <chem>OC1CCCC1</chem>               | 0.71           | 0.82               |
| butan-1-ol                     | <chem>CCCCO</chem>                  | 0.88           | 0.88               |
| 3-methyl-butane-1-ol           | <chem>CC(C)CCO</chem>               | 1.16           | 1.30               |
| cyclohexanol                   | <chem>OC1CCCCC1</chem>              | 1.23           | 1.20               |
| octan-1-ol                     | <chem>CCCCCCCCO</chem>              | 3.00           | 2.89               |
| N,N-dimethyl-formamide         | <chem>CN(C)C=O</chem>               | -1.01          | -0.82              |
| N-methyl-formamide             | <chem>CNC=O</chem>                  | -0.97          | -1.06              |
| N,N-dimethyl-acetamide         | <chem>CN(C)C(C)=O</chem>            | -0.77          | -0.89              |
| nitromethane                   | <chem>C[N+](=O)[O-]</chem>          | -0.35          | -0.03              |
| diethylamine                   | <chem>CCNCC</chem>                  | 0.66           | 0.65               |

| Name                     | SMILES                                                    | $\log P_{exp}$ | $\langle q-ACSFs \rangle_{conf}$ |
|--------------------------|-----------------------------------------------------------|----------------|----------------------------------|
| 4-methyl-pyridine        | <chem>Cc1ccncc1</chem>                                    | 1.22           | 1.34                             |
| triethylamine            | <chem>CCN(CC)CC</chem>                                    | 1.65           | 1.46                             |
| 1,4-Dioxane              | <chem>C1COCCO1</chem>                                     | -0.27          | -0.38                            |
| formic acid ethyl ester  | <chem>CCOC=O</chem>                                       | 0.23           | 0.20                             |
| 1,2,3-triacetoxy-propane | <chem>CC(=O)OCC(COC(C)=O)OC(C)=O</chem>                   | 0.25           | 0.29                             |
| heptan-2-one             | <chem>CCCCCC(C)=O</chem>                                  | 1.98           | 1.96                             |
| phenol                   | <chem>Oc1ccccc1</chem>                                    | 1.46           | 1.39                             |
| benzonitrile             | <chem>N#Cc1ccccc1</chem>                                  | 1.56           | 1.58                             |
| benzene                  | <chem>c1ccccc1</chem>                                     | 2.13           | 2.19                             |
| toluene                  | <chem>CC1=CC=CC=C1</chem>                                 | 2.73           | 2.68                             |
| <i>o</i> -xylene         | <chem>CC1=CC=CC=C1C</chem>                                | 3.12           | 3.17                             |
| <i>p</i> -xylene         | <chem>CC1=CC=C(C=C1)C</chem>                              | 3.15           | 3.19                             |
| acetonitrile             | <chem>CC#N</chem>                                         | -0.33          | -0.39                            |
| <i>m</i> -xylene         | <chem>CC1=CC(=CC=C1)C</chem>                              | 3.20           | 3.17                             |
| naphthalene              | <chem>C1=CC=C2C=CC=CC2=C1</chem>                          | 3.30           | 3.37                             |
| 1-methyl-naphthalene     | <chem>Cc1cccc2ccccc12</chem>                              | 3.87           | 3.86                             |
| pyrene                   | <chem>C1=CC2=C3C(=C1)C=CC4=CC=CC(=C43)C=C2</chem>         | 4.88           | 5.06                             |
| <i>p</i> -terphenyl      | <chem>C1=CC=C(C=C1)C2=CC=C(C=C2)C3=CC=CC=C3</chem>        | 6.03           | 5.74                             |
| benzo(e)pyrene           | <chem>C1=CC=C2C(=C1)C3=CC=CC4=C3C5=C(C=CC=C25)C=C4</chem> | 6.44           | 6.22                             |

## S3 Summary of molecular entropy

Table S3: Properties of molecules for building the correlation between partition coefficient ( $\log P$ ) and entropy ( $S$ ) measured experimentally or calculated by quantum mechanism at b3lyp/6-31g(d) level.

| Name              | SMILES                                       | $\log P_{exp}$ | $S_{exp}^a$ | $S_{QM}^{trans}^a$ | $S_{QM}^{rot}^a$ | $S_{QM}^{vib}^a$ | $S_{QM}^{total}^a$ |
|-------------------|----------------------------------------------|----------------|-------------|--------------------|------------------|------------------|--------------------|
| Methane           | C                                            | 1.09           | 187.46      | 143.41             | 42.44            | 0.32             | 186.17             |
| Cyclohexane       | C1CCCCC1                                     | 3.44           | 298.19      | 164.09             | 110.41           | 37.62            | 312.12             |
| 1,4-Dioxane       | C1COCCO1                                     | -0.27          | 299.91      | 164.67             | 103.12           | 30.45            | 298.23             |
| Butanal           | CCCC=O                                       | 0.88           | 344.80      | 162.16             | 107.50           | 58.75            | 328.41             |
| Pentane           | CCCCC                                        | 3.39           | 347.82      | 162.17             | 103.44           | 66.23            | 331.85             |
| o-xylene          | CC1=CC=CC=C1C                                | 3.12           | 353.60      | 166.99             | 117.19           | 68.11            | 352.29             |
| m-xylene          | CC1=CC(=CC=C1)C                              | 3.2            | 358.20      | 166.99             | 117.86           | 100.34           | 385.19             |
| Hexane            | CCCCCC                                       | 3.9            | 388.82      | 164.39             | 114.24           | 90.81            | 369.43             |
| Octane            | CCCCCCCC                                     | 5.18           | 467.06      | 167.90             | 122.47           | 142.72           | 433.09             |
| Nonane            | CCCCCCCCC                                    | 5.45           | 506.50      | 169.35             | 120.13           | 169.64           | 459.12             |
| decane            | CCCCCCCCC                                    | 5.01           | 545.80      | 170.64             | 123.11           | 197.42           | 491.17             |
| dodecane          | CCCCCCCCCCCC                                 | 6.1            | 622.50      | 172.89             | 128.35           | 252.61           | 553.85             |
| Tetradecane       | CCCCCCCCCCCCC                                | 7.2            | 700.40      | 174.79             | 132.80           | 311.75           | 619.34             |
| Hexadecane        | CCCCCCCCCCCCCCC                              | 8.2            | 778.31      | 176.44             | 136.65           | 368.64           | 681.74             |
| 5-Nonanone        | CCCCC(=O)CCCC                                | 2.88           | -           | 170.64             | 127.84           | 199.79           | 498.28             |
| hexadecanoic acid | CCCCCCCCCCCCCCCC(=O)O                        | 7.17           | -           | 177.99             | 146.48           | 405.60           | 730.08             |
| Octadecanoic acid | CCCCCCCCCCCCCCCCCCCC(=O)O                    | 8.35           | -           | 179.29             | 149.56           | 463.79           | 792.63             |
| Ethane            | CC                                           | 1.81           | -           | 151.25             | 68.21            | 8.09             | 227.54             |
| Propane           | CCC                                          | 2.36           | -           | 156.03             | 89.23            | 22.87            | 268.12             |
| Butane            | CCCC                                         | 2.89           | -           | 159.47             | 96.95            | 43.44            | 299.86             |
| Heptane           | CCCCCCC                                      | 4.66           | -           | 166.27             | 112.96           | 116.26           | 395.49             |
| Octadecane        | CCCCCCCCCCCCCCCC                             | 9.32           | -           | 177.90             | 140.05           | 427.34           | 745.29             |
| Benzene           | C1=CC=CC=C1                                  | 2.13           | -           | 163.16             | 107.41           | 18.35            | 288.93             |
| Toluene           | CC1=CC=CC=C1                                 | 2.73           | -           | 165.22             | 112.96           | 54.06            | 332.25             |
| Naphthalene       | C1=CC=C2C=CC=CC2=C1                          | 3.3            | -           | 169.34             | 121.15           | 52.60            | 343.09             |
| p-terphenyl       | C1=CC=C(C=C1)C2=CC=C(C=C2)C3=CC=CC=C3        | 6.03           | -           | 176.65             | 139.15           | 177.44           | 493.24             |
| Benzo(e)pyrene    | C1=CC=C2C(=C1)C3=CC=CC4=C3C5=C(C=CC=C25)C=C4 | 6.44           | -           | 177.79             | 139.32           | 145.66           | 462.78             |
| Pyrene            | C1=CC2=C3C(=C1)C=CC4=CC=CC(=C43)C=C2         | 4.88           | -           | 175.03             | 127.13           | 99.15            | 401.31             |
| p-xylene          | CC1=CC=C(C=C1)C                              | 3.15           | -           | 166.99             | 111.42           | 95.29            | 373.70             |

<sup>a</sup> in the unit of  $J \cdot mol^{-1} K^{-1}$



## S4 Atom-centered Symmetry Functions (ACSFs)

Atom-centered symmetry functions describe the local chemical environment of atom  $i$  with two sets of parameters, namely, radial and angular distributions. The radial distribution is expressed as below:

$$G_i^{rad} = \sum_{j \neq i}^{all} e^{-\eta(R_{ij}-R_s)^2} f_c(R_{ij}) \quad (S1)$$

where  $R_{ij}$  is the distance between atom  $i$  and  $j$ , parameters  $\eta$  and  $R_s$  determines the width and peak position of the Gaussian function.  $f_c$  is a cutoff function that utilized here to only take atoms that within the local environment into consideration. It is a function related to the distance  $R_{ij}$  and take the form

$$f_c(R_{ij}) = \begin{cases} 0.5 \times [\cos(\frac{\pi R_{ij}}{R_c}) + 1] & \text{for } R_{ij} \leq R_c; \\ 0 & \text{for } R_{ij} > R_c \end{cases} \quad (S2)$$

where  $R_c$  is the distance that specifying how large the region size that should be considered. In this work, the cutoff distance was all set to be 6.0 Å.

The angular symmetry functions are described in eq. S3:

$$G_i^{ang} = 2^{1-\zeta} \sum_{j,k \neq i}^{all} (1 + \lambda \cos(\theta_{ijk}))^\zeta \times e^{-\eta(R_{ij}^2 + R_{ik}^2 + R_{jk}^2)} f_c(R_{ij}) f_c(R_{ik}) f_c(R_{jk}) \quad (S3)$$

Here,  $\theta_{ijk}$  is the angle formed between the atoms  $i$ ,  $j$  and  $k$ .  $R$  is the distance between any two atoms specified in the subscripts. Parameter  $\eta$  again determines the width of the Gaussian function, the peak position of Gaussian function is set to be 0.  $\lambda$  is a parameter which could only take the value of +1 and -1 so as to shift the maxima of the cosine function to 0° and 180°, respectively.  $\zeta$  is a parameter controls the angular resolution. High  $\zeta$  values result in a narrow distribution of angular symmetry function values.

## S5 Grid search of optimal parameters

The Adam optimizer<sup>1</sup> was utilized here for the gradient descent updates. Four different learning rates ( $1e-2$ ,  $1e-3$ ,  $1e-4$  and  $1e-5$ ) together with four different architectures ( $25-25-25$ ,  $50-50-50$ ,  $75-75-75$  and  $100-100-100$ ) were tested. Detailed results could be found in Table S4-S7. In four different learning rates, a factor of 0.999 was applied and the learning rate decayed every 10000 steps. A gradient norm clipping strategy was employed so as to avoid exploding gradient problems.<sup>2</sup> For the reduction of overfitting and the generalization of models, early stopping strategy was applied with maximum number of training steps set to be 1000. The total trainings steps were all set to be 200000. The high-dimensional neural networks mentioned above was built with the Tensorflow.<sup>3</sup>

Table S4: Grid search for different architectures and learning rates, where the polarization effects and entropy are encoded into the conventional atom-centered symmetry functions ( $\langle q - ACSFs \rangle_{conf}$ )

| Datasets     | arch.       | lr | 1e-2 |      |      | 1e-3        |             |             | 1e-4 |      |      | 1e-5 |      |      |
|--------------|-------------|----|------|------|------|-------------|-------------|-------------|------|------|------|------|------|------|
|              |             |    | MAE  | MSE  | RMSE | MAE         | MSE         | RMSE        | MAE  | MSE  | RMSE | MAE  | MSE  | RMSE |
| Martel       | 100-100-100 |    | 1.51 | 3.36 | 1.83 | 0.87        | 1.35        | 1.16        | 0.98 | 1.80 | 1.34 | 0.81 | 1.16 | 1.07 |
| Star&Nonstar |             |    | 0.86 | 1.20 | 1.09 | 0.59        | 0.70        | 0.84        | 0.60 | 0.78 | 0.88 | 0.63 | 0.70 | 0.84 |
| Huuskonen    |             |    | 0.56 | 0.54 | 0.74 | 0.20        | 0.13        | 0.35        | 0.23 | 0.14 | 0.37 | 0.35 | 0.26 | 0.51 |
| Martel       | 75-75-75    |    | 0.79 | 1.00 | 1.00 | 0.92        | 1.56        | 1.25        | 0.87 | 1.43 | 1.20 | 0.82 | 1.19 | 1.09 |
| Star&Nonstar |             |    | 1.24 | 2.83 | 1.68 | 0.56        | 0.57        | 0.76        | 0.59 | 0.69 | 0.83 | 0.60 | 0.65 | 0.81 |
| Huuskonen    |             |    | 0.55 | 0.61 | 0.78 | 0.21        | 0.12        | 0.35        | 0.27 | 0.17 | 0.41 | 0.35 | 0.25 | 0.50 |
| Martel       | 50-50-50    |    | 0.89 | 1.30 | 1.14 | 0.91        | 1.54        | 1.24        | 0.90 | 1.50 | 1.22 | 0.84 | 1.25 | 1.12 |
| Star&Nonstar |             |    | 0.58 | 0.59 | 0.77 | 0.52        | 0.51        | 0.72        | 0.60 | 0.69 | 0.83 | 0.60 | 0.64 | 0.80 |
| Huuskonen    |             |    | 0.33 | 0.23 | 0.48 | 0.21        | 0.12        | 0.35        | 0.29 | 0.19 | 0.44 | 0.35 | 0.25 | 0.50 |
| Martel       | 25-25-25    |    | 1.07 | 1.87 | 1.37 | <b>0.91</b> | <b>1.50</b> | <b>1.23</b> | 0.87 | 1.34 | 1.16 | 0.86 | 1.31 | 1.15 |
| Star&Nonstar |             |    | 0.59 | 0.57 | 0.75 | <b>0.48</b> | <b>0.44</b> | <b>0.66</b> | 0.57 | 0.60 | 0.78 | 0.59 | 0.63 | 0.80 |
| Huuskonen    |             |    | 0.31 | 0.19 | 0.43 | <b>0.22</b> | <b>0.12</b> | <b>0.35</b> | 0.30 | 0.20 | 0.45 | 0.36 | 0.26 | 0.51 |

Table S5: Grid search for different architectures and learning rates, where only polarization effects and the stablest conformation are encoded into the conventional atom-centered symmetry functions ( $q - ACSFs^{max}$ )

| Datasets     | arch.       | lr | 1e-2 |      |      | 1e-3        |             |             | 1e-4 |      |      | 1e-5 |      |      |
|--------------|-------------|----|------|------|------|-------------|-------------|-------------|------|------|------|------|------|------|
|              |             |    | MAE  | MSE  | RMSE | MAE         | MSE         | RMSE        | MAE  | MSE  | RMSE | MAE  | MSE  | RMSE |
| Martel       | 100-100-100 |    | 0.73 | 0.88 | 0.94 | 0.87        | 1.29        | 1.14        | 0.94 | 1.66 | 1.29 | 0.89 | 1.41 | 1.19 |
| Star&Nonstar |             |    | 1.05 | 1.90 | 1.38 | 0.64        | 0.80        | 0.89        | 0.58 | 0.72 | 0.85 | 0.59 | 0.63 | 0.79 |
| Huuskonen    |             |    | 0.54 | 0.56 | 0.75 | 0.21        | 0.14        | 0.37        | 0.23 | 0.14 | 0.37 | 0.35 | 0.25 | 0.50 |
| Martel       | 75-75-75    |    | 1.67 | 3.69 | 1.92 | <b>0.90</b> | <b>1.53</b> | <b>1.23</b> | 0.92 | 1.58 | 1.26 | 0.86 | 1.33 | 1.15 |
| Star&Nonstar |             |    | 2.44 | 9.22 | 3.04 | <b>0.54</b> | <b>0.54</b> | <b>0.74</b> | 0.60 | 0.73 | 0.85 | 0.60 | 0.64 | 0.80 |
| Huuskonen    |             |    | 1.08 | 1.75 | 1.32 | <b>0.22</b> | <b>0.13</b> | <b>0.37</b> | 0.27 | 0.17 | 0.41 | 0.35 | 0.25 | 0.50 |
| Martel       | 50-50-50    |    | 0.90 | 1.26 | 1.12 | 0.94        | 1.61        | 1.27        | 0.90 | 1.45 | 1.21 | 0.87 | 1.36 | 1.17 |
| Star&Nonstar |             |    | 0.65 | 0.76 | 0.87 | 0.53        | 0.52        | 0.72        | 0.58 | 0.64 | 0.80 | 0.59 | 0.64 | 0.80 |
| Huuskonen    |             |    | 0.37 | 0.27 | 0.52 | 0.21        | 0.12        | 0.35        | 0.29 | 0.19 | 0.43 | 0.35 | 0.25 | 0.50 |
| Martel       | 25-25-25    |    | 0.89 | 1.34 | 1.16 | 0.95        | 1.65        | 1.28        | 0.86 | 1.32 | 1.15 | 0.87 | 1.33 | 1.15 |
| Star&Nonstar |             |    | 0.55 | 0.56 | 0.75 | 0.52        | 0.51        | 0.71        | 0.58 | 0.64 | 0.80 | 0.60 | 0.64 | 0.80 |
| Huuskonen    |             |    | 0.27 | 0.18 | 0.42 | 0.23        | 0.13        | 0.37        | 0.31 | 0.21 | 0.45 | 0.36 | 0.26 | 0.51 |

Table S6: Grid search for different architectures and learning rates, where only entropy effects are encoded into the conventional atom-centered symmetry functions ( $\langle ACSFs \rangle_{conf}$ )

| Datasets     | lr          |  | 1e-2 |       |      | 1e-3 |      |      | 1e-4 |      |      | 1e-5        |             |             |
|--------------|-------------|--|------|-------|------|------|------|------|------|------|------|-------------|-------------|-------------|
|              | arch.       |  | MAE  | MSE   | RMSE | MAE  | MSE  | RMSE | MAE  | MSE  | RMSE | MAE         | MSE         | RMSE        |
| Martel       | 100-100-100 |  | 1.85 | 4.25  | 2.06 | 1.04 | 1.84 | 1.36 | 1.03 | 1.8  | 1.34 | 1.06        | 1.89        | 1.38        |
| Star&Nonstar |             |  | 0.96 | 1.39  | 1.18 | 0.84 | 1.29 | 1.14 | 0.87 | 1.36 | 1.16 | 0.79        | 1.17        | 1.08        |
| Huuskonen    |             |  | 0.91 | 1.28  | 1.13 | 0.58 | 0.61 | 0.78 | 0.48 | 0.45 | 0.67 | 0.52        | 0.49        | 0.70        |
| Martel       | 75-75-75    |  | 0.83 | 1.12  | 1.06 | 0.95 | 1.58 | 1.26 | 1.05 | 1.89 | 1.37 | 1.03        | 1.84        | 1.36        |
| Star&Nonstar |             |  | 1.36 | 3.46  | 1.86 | 0.92 | 1.54 | 1.24 | 0.77 | 1.06 | 1.03 | 0.84        | 1.34        | 1.16        |
| Huuskonen    |             |  | 0.67 | 0.78  | 0.88 | 0.58 | 0.62 | 0.79 | 0.49 | 0.44 | 0.66 | 0.54        | 0.53        | 0.73        |
| Martel       | 50-50-50    |  | 1.90 | 4.80  | 2.19 | 0.99 | 1.67 | 1.29 | 1.08 | 1.96 | 1.40 | <b>0.97</b> | <b>1.66</b> | <b>1.29</b> |
| Star&Nonstar |             |  | 2.81 | 13.13 | 3.62 | 0.82 | 1.19 | 1.09 | 0.77 | 1.12 | 1.06 | <b>0.83</b> | <b>1.27</b> | <b>1.13</b> |
| Huuskonen    |             |  | 1.08 | 1.87  | 1.37 | 0.57 | 0.57 | 0.75 | 0.51 | 0.47 | 0.69 | <b>0.54</b> | <b>0.53</b> | <b>0.73</b> |
| Martel       | 25-25-25    |  | 0.82 | 1.10  | 1.05 | 1.01 | 1.77 | 1.33 | 1.04 | 1.84 | 1.36 | 0.98        | 1.64        | 1.28        |
| Star&Nonstar |             |  | 1.28 | 3.11  | 1.76 | 0.83 | 1.27 | 1.13 | 0.83 | 1.30 | 1.14 | 0.83        | 1.30        | 1.14        |
| Huuskonen    |             |  | 0.66 | 0.76  | 0.87 | 0.56 | 0.56 | 0.75 | 0.54 | 0.54 | 0.73 | 0.57        | 0.60        | 0.77        |

Table S7: Grid search for different architectures and learning rates, where only the stablest conformation was encoded into the conventional atom-centered symmetry functions ( $ACSFs^{max}$ )

| Datasets     | lr          |  | 1e-2 |      |      | 1e-3 |      |      | 1e-4        |             |             | 1e-5 |      |      |
|--------------|-------------|--|------|------|------|------|------|------|-------------|-------------|-------------|------|------|------|
|              | arch.       |  | MAE  | MSE  | RMSE | MAE  | MSE  | RMSE | MAE         | MSE         | RMSE        | MAE  | MSE  | RMSE |
| Martel       | 100-100-100 |  | 1.10 | 1.94 | 1.39 | 0.96 | 1.63 | 1.28 | 1.15        | 2.19        | 1.48        | 1.10 | 2.00 | 1.42 |
| Star&Nonstar |             |  | 0.98 | 1.71 | 1.31 | 0.96 | 1.62 | 1.27 | 0.79        | 1.16        | 1.08        | 0.79 | 1.12 | 1.06 |
| Huuskonen    |             |  | 0.71 | 0.82 | 0.91 | 0.58 | 0.62 | 0.79 | 0.48        | 0.45        | 0.67        | 0.52 | 0.48 | 0.70 |
| Martel       | 75-75-75    |  | 1.35 | 2.63 | 1.62 | 1.00 | 1.70 | 1.30 | 1.05        | 1.88        | 1.37        | 0.98 | 1.65 | 1.29 |
| Star&Nonstar |             |  | 2.21 | 8.38 | 2.89 | 0.83 | 1.26 | 1.12 | 0.83        | 1.26        | 1.12        | 0.84 | 1.34 | 1.16 |
| Huuskonen    |             |  | 0.87 | 1.30 | 1.14 | 0.58 | 0.60 | 0.78 | 0.50        | 0.49        | 0.70        | 0.54 | 0.54 | 0.74 |
| Martel       | 50-50-50    |  | 1.41 | 2.86 | 1.69 | 1.09 | 2.03 | 1.42 | 1.06        | 1.88        | 1.37        | 0.98 | 1.69 | 1.30 |
| Star&Nonstar |             |  | 2.28 | 8.79 | 2.97 | 0.77 | 1.10 | 1.05 | 0.79        | 1.17        | 1.08        | 0.83 | 1.30 | 1.14 |
| Huuskonen    |             |  | 0.89 | 1.35 | 1.16 | 0.57 | 0.57 | 0.75 | 0.51        | 0.48        | 0.69        | 0.55 | 0.57 | 0.75 |
| Martel       | 25-25-25    |  | 1.02 | 1.63 | 1.28 | 1.01 | 1.80 | 1.34 | <b>0.96</b> | <b>1.60</b> | <b>1.27</b> | 0.97 | 1.57 | 1.25 |
| Star&Nonstar |             |  | 0.94 | 1.51 | 1.23 | 0.79 | 1.15 | 1.07 | <b>0.82</b> | <b>1.27</b> | <b>1.13</b> | 0.83 | 1.26 | 1.12 |
| Huuskonen    |             |  | 0.71 | 0.82 | 0.91 | 0.56 | 0.55 | 0.74 | <b>0.54</b> | <b>0.53</b> | <b>0.73</b> | 0.57 | 0.60 | 0.77 |

Table S8: Grid search for different architectures and learning rates with all four public datasets taking into consideration, where the polarization effects and the ensemble effects are encoded into the conventional atom-centered symmetry functions ( $\langle q - ACSFs \rangle_{conf}$ )

| lr          |  | 1e-2 |      |      | 1e-3 |      |      | 1e-4        |             |             | 1e-5 |      |      |
|-------------|--|------|------|------|------|------|------|-------------|-------------|-------------|------|------|------|
| arch.       |  | MAE  | MSE  | RMSE | MAE  | MSE  | RMSE | MAE         | MSE         | RMSE        | MAE  | MSE  | RMSE |
| 100-100-100 |  | 2.15 | 7.42 | 2.72 | 0.35 | 0.27 | 0.52 | <b>0.35</b> | <b>0.26</b> | <b>0.51</b> | 0.42 | 0.33 | 0.57 |
| 75-75-75    |  | 1.76 | 4.79 | 2.19 | 0.37 | 0.30 | 0.54 | 0.36        | 0.28        | 0.53        | 0.42 | 0.33 | 0.57 |
| 50-50-50    |  | 0.89 | 1.39 | 1.18 | 0.37 | 0.31 | 0.56 | 0.37        | 0.28        | 0.53        | 0.42 | 0.33 | 0.58 |
| 25-25-25    |  | 0.49 | 0.44 | 0.67 | 0.37 | 0.30 | 0.55 | 0.38        | 0.29        | 0.54        | 0.43 | 0.34 | 0.58 |

Table S9: Grid search for different architectures and learning rates with all four public datasets taking into consideration, where the ensemble effects are encoded into the conventional atom-centered symmetry functions ( $\langle ACSFs \rangle_{conf}$ )

| lr          |  | 1e-2 |      |      | 1e-3 |      |      | 1e-4        |             |             | 1e-5 |      |      |
|-------------|--|------|------|------|------|------|------|-------------|-------------|-------------|------|------|------|
| arch.       |  | MAE  | MSE  | RMSE | MAE  | MSE  | RMSE | MAE         | MSE         | RMSE        | MAE  | MSE  | RMSE |
| 100-100-100 |  | 1.94 | 5.53 | 2.35 | 0.69 | 0.83 | 0.91 | 0.62        | 0.70        | 0.83        | 0.62 | 0.68 | 0.83 |
| 75-75-75    |  | 2.54 | 9.95 | 3.15 | 0.68 | 0.82 | 0.91 | 0.62        | 0.68        | 0.83        | 0.62 | 0.68 | 0.83 |
| 50-50-50    |  | 1.93 | 5.79 | 2.41 | 0.66 | 0.74 | 0.86 | <b>0.61</b> | <b>0.68</b> | <b>0.82</b> | 0.62 | 0.69 | 0.83 |
| 25-25-25    |  | 1.23 | 2.72 | 1.65 | 0.63 | 0.70 | 0.84 | 0.62        | 0.68        | 0.82        | 0.64 | 0.72 | 0.85 |

## S6 Distribution of chemical elements and partition coefficient among 6 datasets

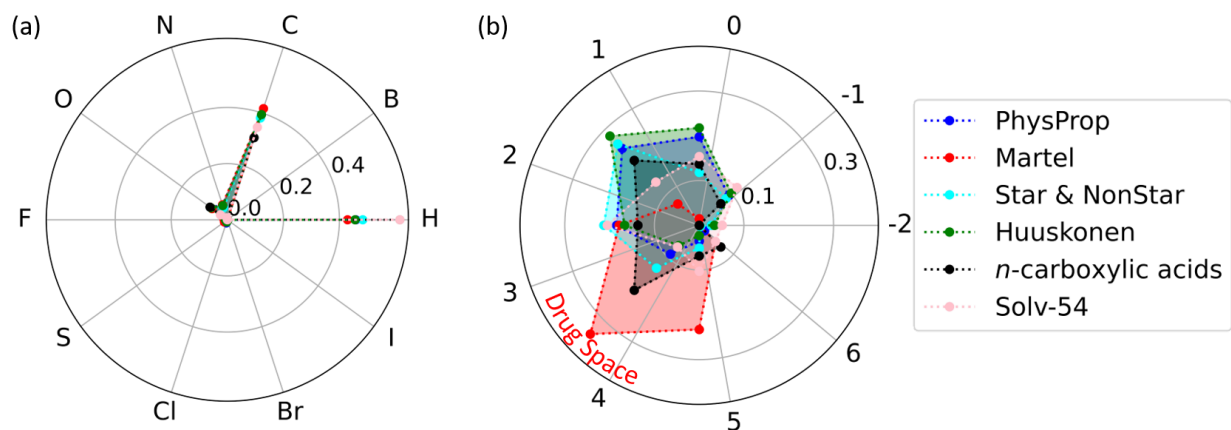

Figure S1: Distribution of (a) chemical elements and (b) partition coefficient ( $\log P$ ) among 6 public databases.

For database PhysProp, the  $\log P$  values mainly concentrate around 2 (blue shadows). For database Star & Non-Star and Huuskonen, the distribution did not change a lot. (cyan and green shadows) As the Martel is more compatible with pharmaceutical company, the  $\log P$  distribution is quite different from the above mentioned three databases and values are almost small than 5 and concentrate around 4, (red shadows) which follows the Lipinski's rule of five.<sup>4</sup>

## S7 Computational Details

### S7.1 Molecular Dynamics Simulations

For the small organic molecules, RDKit<sup>5</sup> and OpenBabel<sup>6</sup> were utilized to convert molecules from SMILES<sup>7,8</sup> format to PDB format. Subsequently, GAFF2<sup>9</sup> force fields were applied. The process of generating GAFF2 parameters leads to a final of 4802, 178, 156, and 1122 molecules for PhysProp, Martel, Star & NonStar, and Huuskonen, respectively. With all bonds that involve hydrogen atom are constrained, the integration time step was set to be 2 fs. LangevinMiddleIntegrator<sup>10</sup> method was applied, with temperature set to be 300 *K* and the friction coefficient to be 1 *ps*<sup>-1</sup>. As all simulations were performed in the vacuum and the electrostatic and van der Waals (vdW) interactions were calculated over the whole chemical spaces without cutoff. To sample the conformational space, trajectories which last 1 *ns* were generated for each small organic molecules following a local energy minimization with tolerance set to be 10.0 *kJ/mol*. All simulations were performed with package suite OpenMM.<sup>11</sup>

Considering the large amount of conformations generated from molecular dynamics simulations, K-Means clustering method<sup>12</sup> was utilized here to divide structures into 3 groups. To pick the centroid as the representative structure for each group, we computed all of the pairwise RMSDs between conformations among a certain group, and transformed these distances into similarity scores according to eq. S4

$$s_{ij} = e^{-d_{ij}/d_{scale}} \quad (\text{S4})$$

Where  $d_{ij} = \sqrt{\frac{\sum_{n=1}^{N_{atoms}} (r_i^n - r_j^n)^2}{N_{atoms}}}$  is the pairwise distance between  $i_{th}$  and  $j_{th}$  conformations, and  $d_{scale}$  is a parameter which is the standard deviation of the pairwise distance so as to make the computation scale invariant.

The centroid structure is picked with the highest similarities and the mathematical expression is as follows:

$$\operatorname{argmax}_i \sum_j s_{ij} \quad (\text{S5})$$

The probability of selected  $i_{th}$  conformation is defined as below

$$p_i = \frac{e^{-\Delta E_i/k_B T}}{\sum_{j=1}^M e^{-\Delta E_j/k_B T}} \quad (\text{S6})$$

Where  $k_B$  is the Boltzmann constant,  $T$  is the temperature where the simulation performed,  $M$  is the number of clusters we specified, and  $\Delta E_i$  is the difference between potential energy of the selected conformation  $i$  and the lowest energies of  $M$  clusters. Here, K-Means clustering procedure was implemented with scikit-learn,<sup>13</sup> and trajectories were processed with mdtraj.<sup>14</sup>

## S7.2 Quantum Mechanisms

The density functional theory (DFT) calculations were utilized here for the estimation of entropy with the help of Gaussian 16 package suite.<sup>15</sup> The Becke three-parameter exchange and Lee-Yang-Parr correlation (B3LYP),<sup>16,17</sup> a hybrid density function, was used here for the geometry optimizations and subsequent frequency calculation. The 6-31G(d) basis set was applied for all the organic molecules.

## S8 Evaluation metrics

Performances of models under different descriptors are represented in terms of mean square error ( $MSE$ ) and mean absolute error ( $MAE$ ). These two criteria are defined as below:

$$MSE = \frac{1}{m} \sum_{i=1}^m (y_{test}^{(i)} - \hat{y}_{test}^{(i)})^2 \quad (S7)$$

$$MAE = \frac{1}{m} \sum_{i=1}^m |y_{test}^{(i)} - \hat{y}_{test}^{(i)}| \quad (S8)$$

Where  $m$  denotes the number of the data used for test and  $y_{test}^{(i)}$  and  $\hat{y}_{test}^{(i)}$  denote the actual and predicted ones for the  $i_{th}$  molecule, respectively.

## S9 Principle Component Analysis

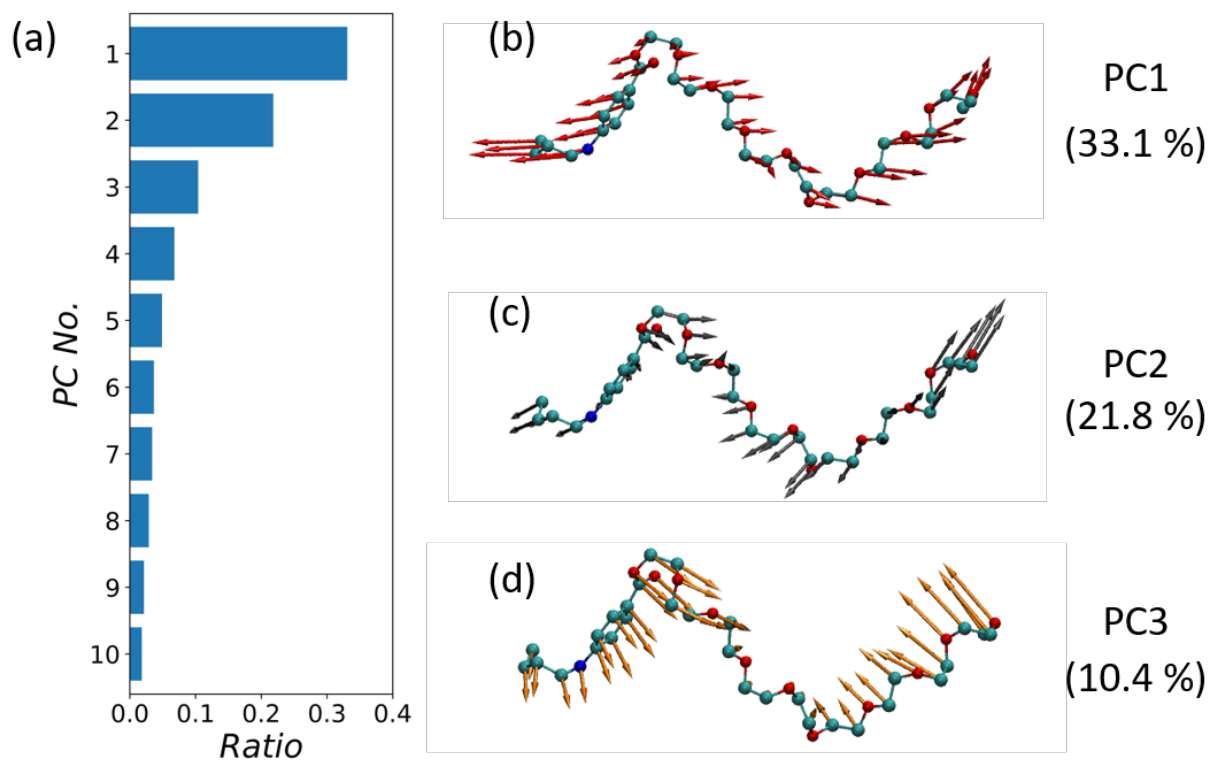

Figure S2: Principle component analysis (PCA). (a) Top 10 ranked principle component ratios; an example of (b) the first (c) second and (d) third mode derived from principle component analysis.



## S10 Generation of Standard Descriptors

To disclose which contributes most to the prediction of partition coefficient ( $\log P$ ), same as Gabriele et. al,<sup>18</sup> we also collected 100 “standard” descriptors directly from the RDKit package.<sup>5</sup> We collected descriptors in several aspects, such as the topological or topochemical descriptors (e.g. electrotopological state (EState),<sup>19</sup> BertzCT,<sup>20</sup> Balaban’s J value (BalabanJ),<sup>21</sup> Chi indexes and Kappa shape indexes<sup>22</sup>), surface area based descriptors, such as, Labute’s approximate surface area (LabuteASA) and hybrid descriptors which take the polarizability ( $SMR-VSA_{k=1,2,\dots,10}$ ), direct electrostatic interactions ( $PEOE-VSA_{k=1,2,\dots,14}$ ) and electrotopological state ( $EState-VSA_{k=1,2,\dots,11}$ ) into considerations,<sup>23</sup> topological polar surface area (TPSA),<sup>24</sup> and some simple and transparent descriptors, to name a few here, molecular weight, number of valance electrons, number of heavy atoms, number of NHs or OHs ( $N_{NHs/OHs}$ ), number of Nitrogens and Oxygens, and so on. The full list could be found in Table S1.

## S11 Feature selection

To better understand the 100 descriptors generated above, we utilize the univariate feature selection and intrinsic algorithm (Random Forests, RFs) to estimate the importance of each descriptor.

Univariate feature selection is a method to exclude noisy features. It examines each feature individually to estimate the strength between the feature and corresponding response variables. In this section, we utilize the Pearson's Correlation Coefficient as the statistical measures. The Pearson's Correlation Coefficient is defined as below:

$$\rho(X, Y) = \frac{E[(X - \mu_X)(Y - \mu_Y)]}{\sigma_X \sigma_Y} = \frac{E[(X - \mu_X)(Y - \mu_Y)]}{\sqrt{\sum_{i=1}^n (X_i - \mu_X)^2} \sqrt{\sum_{i=1}^n (Y_i - \mu_Y)^2}} \quad (\text{S9})$$

where  $X$  denotes the input space and  $Y$  denotes the variables we want to predict.

RF is an intrinsic algorithm which are capable of providing a measure of importance for each descriptor via mean decrease in impurity (MDI). It uses an impurity function  $i(\tau)$  as a measurement of the probability of incorrectly classifying a randomly chosen element in the dataset. It is defined as below:

$$i(\tau) = \sum_{i=1}^C p(i) * (1 - p(i)) \quad (\text{S10})$$

where  $C$  is the number of classes in the dataset, and  $p(i)$  is the probability of picking an element of class  $i$ .

To measure how well a potential split at node  $\tau$  will separate the data, a value named Gini Gain  $\Delta i(\tau)$  is defined. When a node is split, it sends sample points to two sub-nodes, named left and right, and corresponding impurity denotes as  $i(\tau_l)$  and  $i(\tau_r)$ . The Gini Gain is defined as below:

$$\Delta i(\tau) = i(\tau) - p_l i(\tau_l) - p_r i(\tau_r) \quad (\text{S11})$$

The importance of each descriptor  $\theta$  is the summation of Gini Gain of each descriptor ( $\Delta i(\tau)$ ) over all nodes  $\tau$  and trees  $T$ . In the expression of the mathematical form, it is written as below:

$$I(\theta) = \sum_T \sum_{\tau} \Delta i_{\theta}(\tau, T) \quad (\text{S12})$$

We have used the model selection module and RandomForestRegressor embedded in the scikit-learn<sup>13</sup> package to implement these approaches.

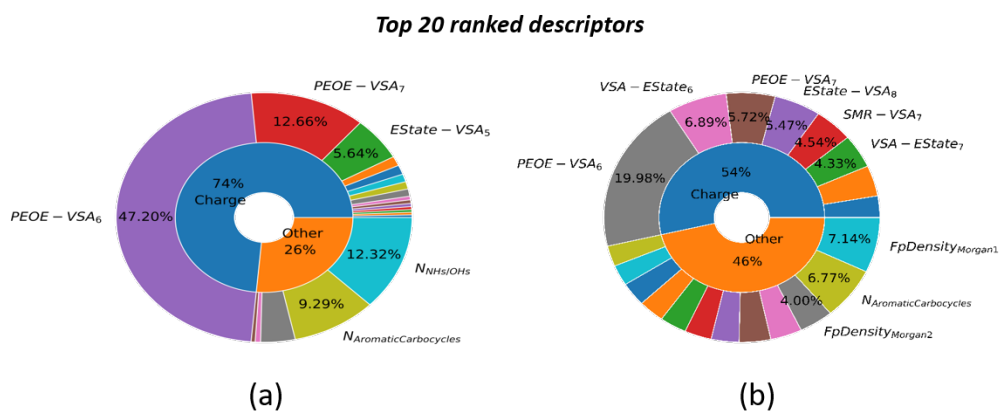

Figure S3: Top 20 ranked descriptors selected based on (a) mean decreased in impurity (MDI) and (b) univariate statistical test, which is implemented with the scikit-learn package.<sup>13</sup>

## S12 An illustration of 5-5 neural network

For instance, the neural network shown in Figure S4 has 2 hidden layers and each layer has 5 nodes, short notation 5 – 5 was utilized here to represent the neural network.

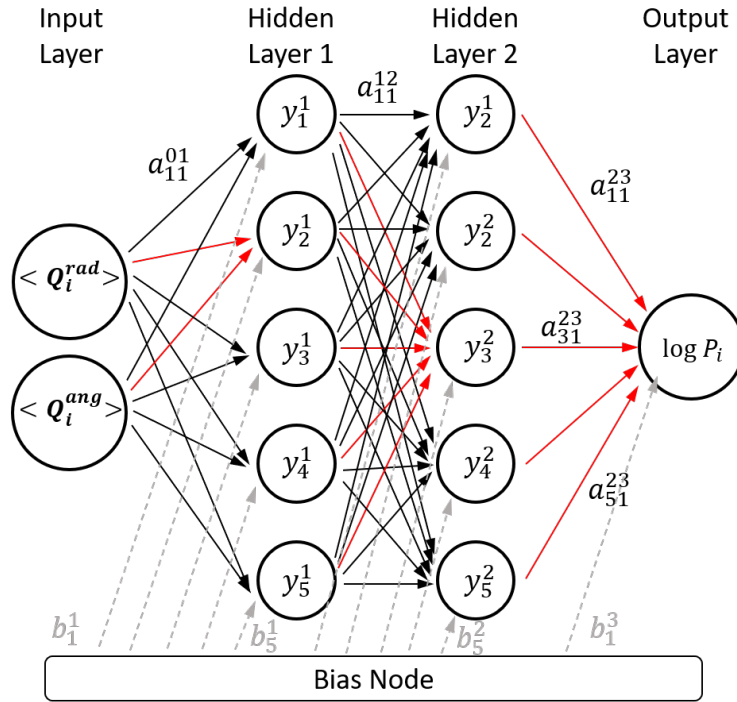

Figure S4: Schematic representation of a feed-forward neural network with 2 hidden layers and each layer has 5 nodes. The function form of the neural network which relates the input layer and output layer is given in eq. S14

As shown in Figure S4, the node  $i$  in layer  $k$  is connected to the node  $j$  in the adjacent layers  $l$  where  $l = k + 1$  with a weight parameter  $a_{ij}^{kl}$  which is represented by the black arrow. The superscript starts from 0 and data flowed from input layer to output layer in one direction. In each node of hidden layer, a bias weight  $b_i^j$  was added as an adjustable offset for the activation function  $f_i^j$ , where  $i$  and  $j$  denote node and layer, respectively. As the red arrow line shown in Figure S4, the value  $y_i^j$  of node  $i$  in any hidden layer  $j$  was derived from the values of the  $N_{j-1}$  nodes in layer  $j - 1$  together with the activation function  $f_i^j$  and bias weight  $b_i^j$ :

$$y_i^j = f_i^j(b_i^j + \sum_{k=1}^{N_{j-1}} a_{k,j}^{j-1,j} \cdot y_k^{j-1}) \quad (\text{S13})$$

The mathematical form between the input layer and output layer is given by the following equation:

$$\log P_i = f_1^3(b_i^3 + \sum_{k=1}^5 a_{k1}^{23} \cdot f_k^2(b_k^2 + \sum_{j=1}^5 a_{jk}^{12} \cdot f_j^1(b_j^1 + \sum_{i=1}^{N_{\mathbf{Q}_i^{\text{rad}}, \mathbf{Q}_i^{\text{ang}}}} a_{ij}^{01} \cdot Q_i))) \quad (\text{S14})$$

# S13 Distribution of contribution from 4 distinct elements with different environment over datasets Star & Non-Star

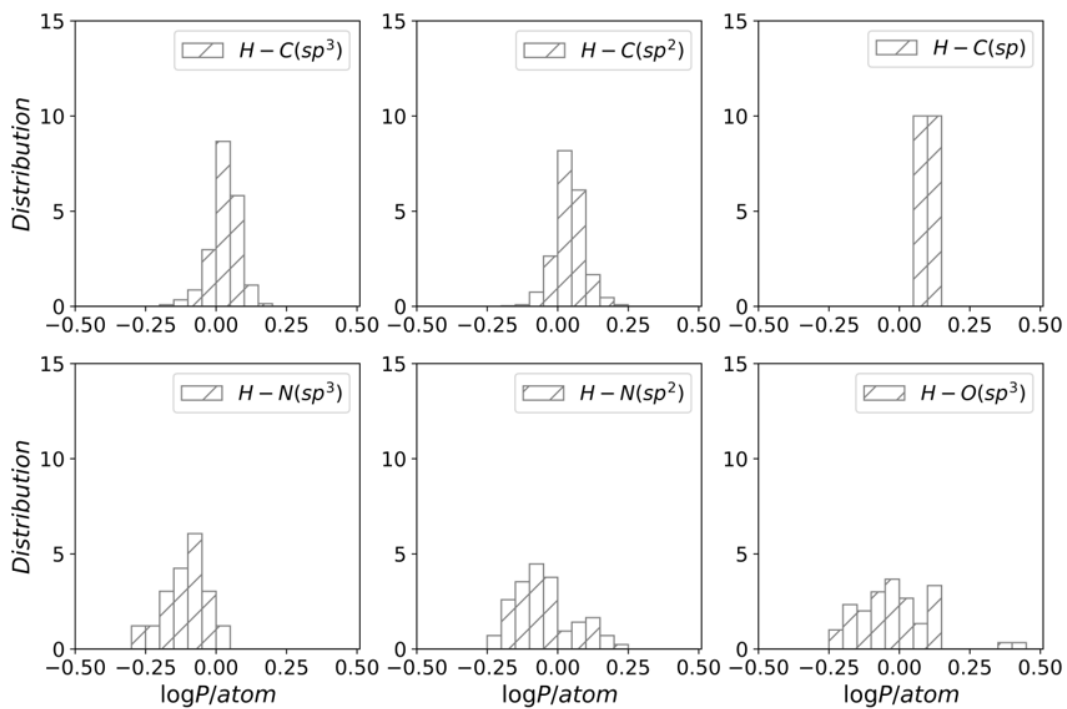

Figure S5: Distribution of contribution from atom H over datasets Star & Non-Star. These contributions were classified according to different surrounding environment.

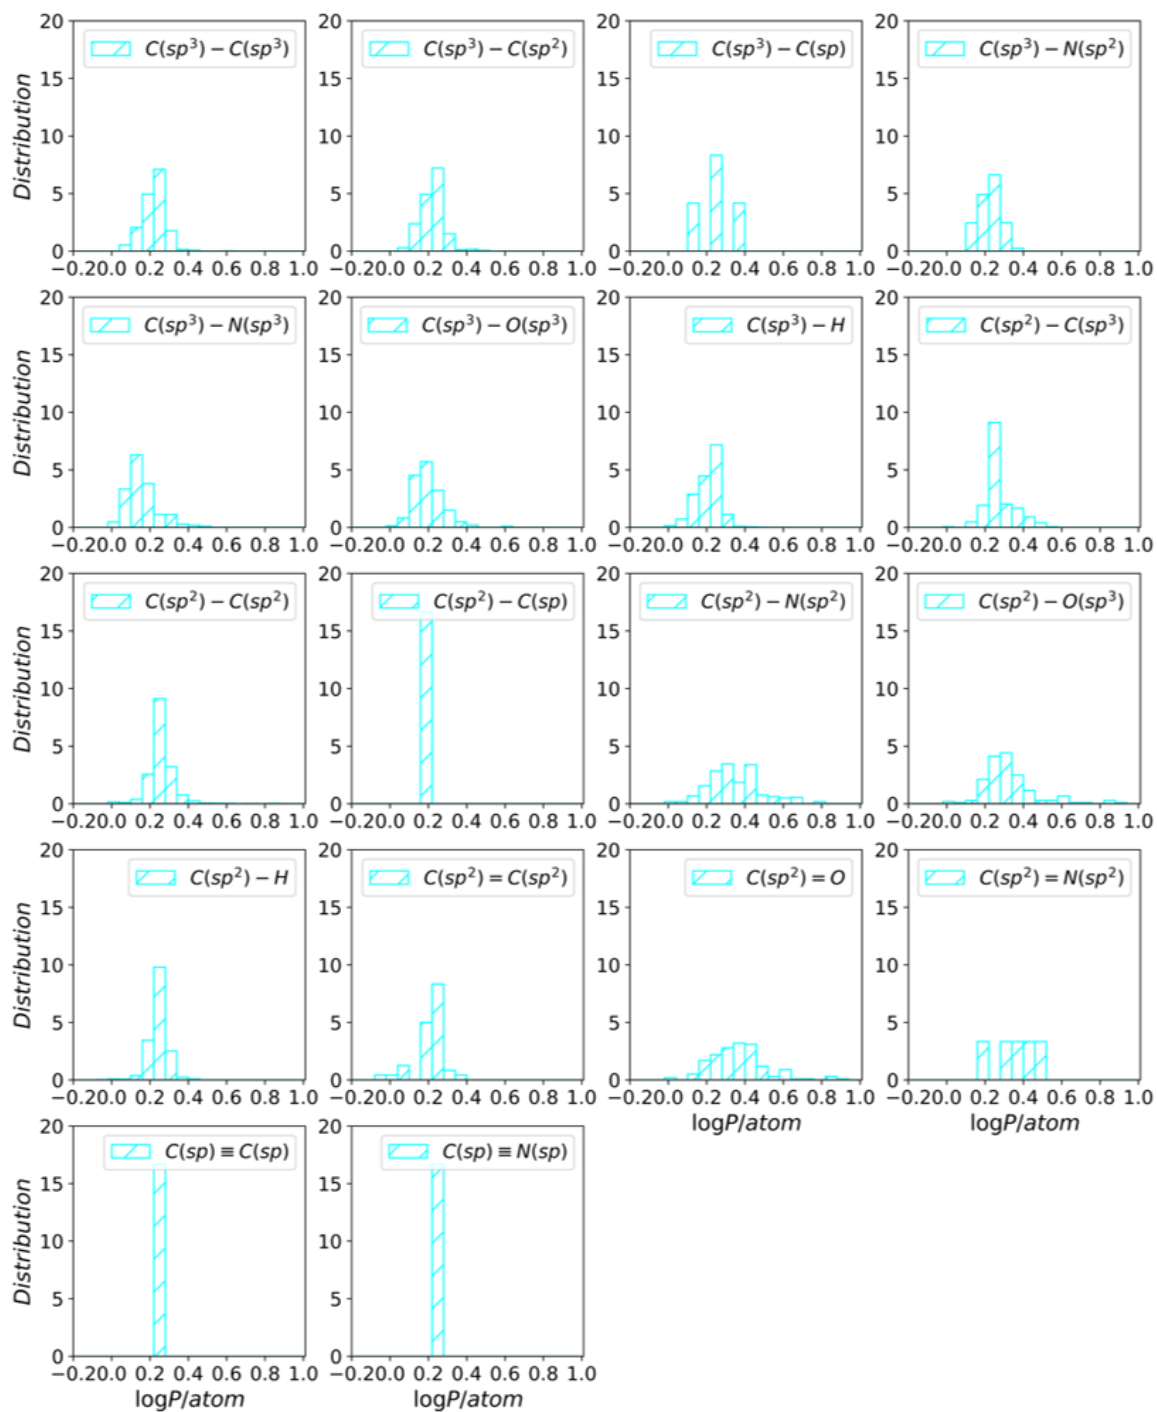

Figure S6: Distribution of contribution from atom C over datasets Star & Non-Star. These contributions were classified according to different surrounding environment.

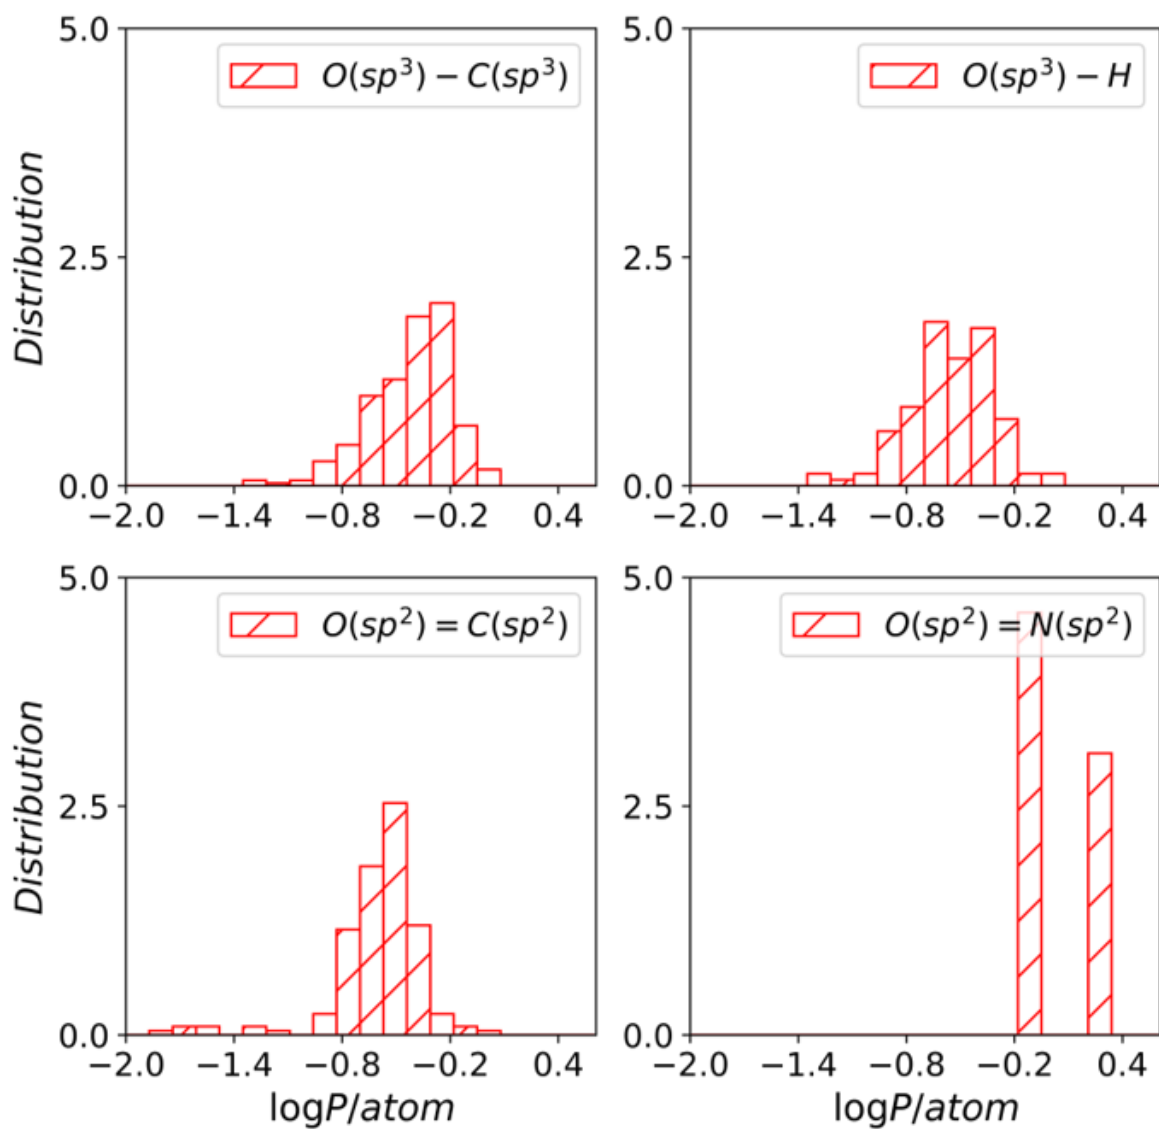

Figure S7: Distribution of contribution from atom O over datasets Star & Non-Star. These contributions were classified according to different surrounding environment.



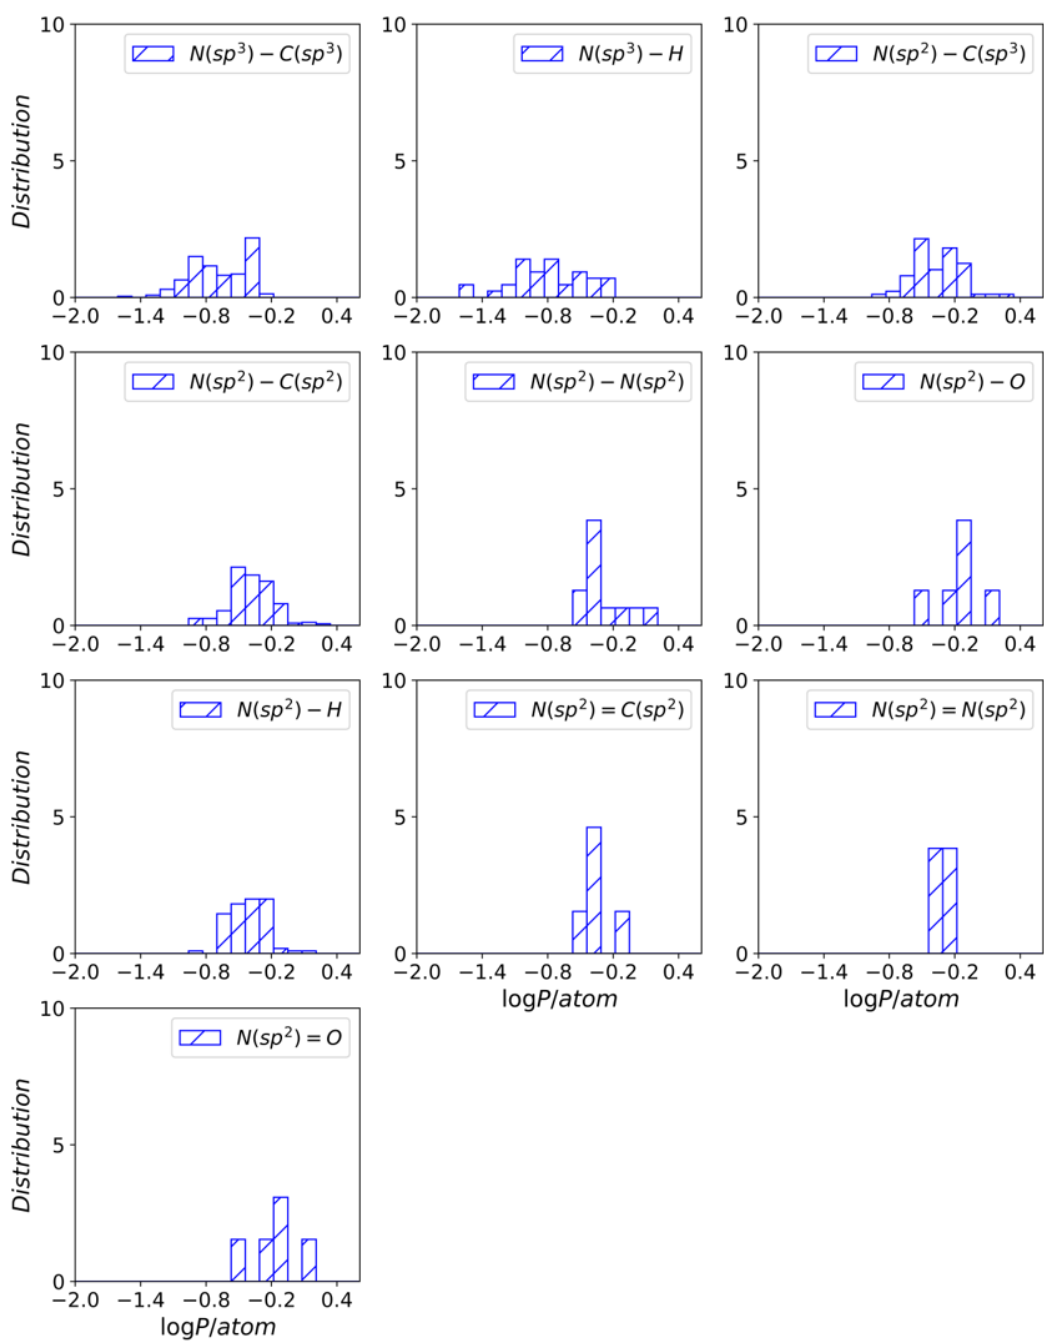

Figure S8: Distribution of contribution from atom N over datasets Star & Non-Star. These contributions were classified according to different surrounding environment.

Table S10: Contribution of 4 elements with distinct environments over datasets Star & Non-Star.

| center Element | bonded Element | bond Type | mean   | std.  |
|----------------|----------------|-----------|--------|-------|
| H              | C( $sp^3$ )    | single    | 0.030  | 0.050 |
|                | C( $sp^2$ )    | single    | 0.041  | 0.051 |
|                | C( $sp$ )      | single    | 0.114  | 0.026 |
|                | N( $sp^3$ )    | single    | -0.108 | 0.073 |
|                | N( $sp^2$ )    | single    | -0.051 | 0.105 |
|                | O( $sp^3$ )    | single    | -0.016 | 0.127 |
| C( $sp^3$ )    | C( $sp^3$ )    | single    | 0.221  | 0.059 |
|                | C( $sp^2$ )    | single    | 0.222  | 0.061 |
|                | C( $sp$ )      | single    | 0.239  | 0.090 |
|                | N( $sp^2$ )    | single    | 0.225  | 0.054 |
|                | N( $sp^3$ )    | single    | 0.159  | 0.081 |
|                | O( $sp^3$ )    | single    | 0.199  | 0.078 |
|                | H              | single    | 0.209  | 0.063 |
| C( $sp^2$ )    | C( $sp^3$ )    | single    | 0.276  | 0.076 |
|                | C( $sp^2$ )    | single    | 0.258  | 0.069 |
|                | C( $sp$ )      | single    | 0.179  | 0.000 |
|                | N( $sp^2$ )    | single    | 0.349  | 0.139 |
|                | O( $sp^3$ )    | single    | 0.329  | 0.140 |
|                | H              | single    | 0.244  | 0.049 |
|                | C( $sp^2$ )    | double    | 0.215  | 0.074 |
|                | O              | double    | 0.367  | 0.146 |
| C( $sp$ )      | N( $sp^2$ )    | double    | 0.345  | 0.101 |
|                | C( $sp$ )      | triple    | 0.239  | 0.008 |
|                | N( $sp$ )      | triple    | 0.256  | 0.000 |
| O( $sp^3$ )    | C( $sp^3$ )    | single    | -0.422 | 0.226 |
|                | H              | single    | -0.554 | 0.233 |
| O( $sp^2$ )    | C( $sp^2$ )    | double    | -0.592 | 0.256 |
|                | N( $sp^2$ )    | double    | 0.059  | 0.185 |
| N( $sp^3$ )    | C( $sp^3$ )    | single    | -0.674 | 0.262 |
|                | H              | single    | -0.781 | 0.337 |
|                | C( $sp^3$ )    | single    | -0.372 | 0.210 |
| N( $sp^2$ )    | C( $sp^2$ )    | single    | -0.392 | 0.202 |
|                | N( $sp^2$ )    | single    | -0.280 | 0.185 |
|                | O              | single    | -0.170 | 0.195 |
|                | H              | single    | -0.406 | 0.170 |
|                | C( $sp^2$ )    | double    | -0.371 | 0.128 |
|                | N( $sp^2$ )    | double    | -0.347 | 0.061 |
|                | O              | double    | -0.172 | 0.213 |

## References

- (1) Kingma, D. P.; Ba, J. Adam: A method for stochastic optimization. *arXiv preprint arXiv:1412.6980* **2014**,
- (2) Pascanu, R.; Mikolov, T.; Bengio, Y. On the difficulty of training recurrent neural networks. International conference on machine learning. 2013; pp 1310–1318.
- (3) Abadi, M.; Agarwal, A.; Barham, P.; Brevdo, E.; Chen, Z.; Citro, C.; Corrado, G. S.; Davis, A.; Dean, J.; Devin, M.; Ghemawat, S.; Goodfellow, I.; Harp, A.; Irving, G.; Isard, M.; Jia, Y.; Jozefowicz, R.; Kaiser, L.; Kudlur, M.; Levenberg, J.; Mané, D.; Monga, R.; Moore, S.; Murray, D.; Olah, C.; Schuster, M.; Shlens, J.; Steiner, B.; Sutskever, I.; Talwar, K.; Tucker, P.; Vanhoucke, V.; Vasudevan, V.; Viégas, F.; Vinyals, O.; Warden, P.; Wattenberg, M.; Wicke, M.; Yu, Y.; Zheng, X. TensorFlow: Large-Scale Machine Learning on Heterogeneous Systems. 2015; <https://www.tensorflow.org/>, Software available from tensorflow.org.
- (4) Lipinski, C. A.; Lombardo, F.; Dominy, B. W.; Feeney, P. J. Experimental and computational approaches to estimate solubility and permeability in drug discovery and development settings. *Advanced drug delivery reviews* **1997**, *23*, 3–25.
- (5) Landrum, G. RDKit: Open-source cheminformatics. <http://www.rdkit.org>.
- (6) O’Boyle, N. M.; Banck, M.; James, C. A.; Morley, C.; Vandermeersch, T.; Hutchison, G. R. Open Babel: An open chemical toolbox. *Journal of cheminformatics* **2011**, *3*, 1–14.
- (7) Weininger, D. SMILES, a chemical language and information system. 1. Introduction to methodology and encoding rules. *Journal of chemical information and computer sciences* **1988**, *28*, 31–36.

- (8) Weininger, D.; Weininger, A.; Weininger, J. L. SMILES. 2. Algorithm for generation of unique SMILES notation. *Journal of chemical information and computer sciences* **1989**, *29*, 97–101.
- (9) Vassetzki, D.; Pagliai, M.; Procacci, P. Assessment of GAFF2 and OPLS-AA general force fields in combination with the water models TIP3P, SPCE, and OPC3 for the solvation free energy of druglike organic molecules. *Journal of chemical theory and computation* **2019**, *15*, 1983–1995.
- (10) Zhang, Z.; Liu, X.; Yan, K.; Tuckerman, M. E.; Liu, J. Unified efficient thermostat scheme for the canonical ensemble with holonomic or isokinetic constraints via molecular dynamics. *The Journal of Physical Chemistry A* **2019**, *123*, 6056–6079.
- (11) Eastman, P.; Swails, J.; Chodera, J. D.; McGibbon, R. T.; Zhao, Y.; Beauchamp, K. A.; Wang, L.-P.; Simmonett, A. C.; Harrigan, M. P.; Stern, C. D., et al. OpenMM 7: Rapid development of high performance algorithms for molecular dynamics. *PLoS computational biology* **2017**, *13*, e1005659.
- (12) Lloyd, S. Least squares quantization in PCM. *IEEE transactions on information theory* **1982**, *28*, 129–137.
- (13) Pedregosa, F.; Varoquaux, G.; Gramfort, A.; Michel, V.; Thirion, B.; Grisel, O.; Blondel, M.; Prettenhofer, P.; Weiss, R.; Dubourg, V.; Vanderplas, J.; Passos, A.; Cournapeau, D.; Brucher, M.; Perrot, M.; Duchesnay, E. Scikit-learn: Machine Learning in Python. *Journal of Machine Learning Research* **2011**, *12*, 2825–2830.
- (14) McGibbon, R. T.; Beauchamp, K. A.; Harrigan, M. P.; Klein, C.; Swails, J. M.; Hernández, C. X.; Schwantes, C. R.; Wang, L.-P.; Lane, T. J.; Pande, V. S. MDTraj: A Modern Open Library for the Analysis of Molecular Dynamics Trajectories. *Biophysical Journal* **2015**, *109*, 1528 – 1532.

- (15) Frisch, M. J.; Trucks, G. W.; Schlegel, H. B.; Scuseria, G. E.; Robb, M. A.; Cheeseman, J. R.; Scalmani, G.; Barone, V.; Petersson, G. A.; Nakatsuji, H.; Li, X.; Caricato, M.; Marenich, A. V.; Bloino, J.; Janesko, B. G.; Gomperts, R.; Menucci, B.; Hratchian, H. P.; Ortiz, J. V.; Izmaylov, A. F.; Sonnenberg, J. L.; Williams-Young, D.; Ding, F.; Lipparini, F.; Egidi, F.; Goings, J.; Peng, B.; Petrone, A.; Henderson, T.; Ranasinghe, D.; Zakrzewski, V. G.; Gao, J.; Rega, N.; Zheng, G.; Liang, W.; Hada, M.; Ehara, M.; Toyota, K.; Fukuda, R.; Hasegawa, J.; Ishida, M.; Nakajima, T.; Honda, Y.; Kitao, O.; Nakai, H.; Vreven, T.; Throssell, K.; Montgomery, J. A., Jr.; Peralta, J. E.; Ogliaro, F.; Bearpark, M. J.; Heyd, J. J.; Brothers, E. N.; Kudin, K. N.; Staroverov, V. N.; Keith, T. A.; Kobayashi, R.; Normand, J.; Raghavachari, K.; Rendell, A. P.; Burant, J. C.; Iyengar, S. S.; Tomasi, J.; Cossi, M.; Millam, J. M.; Klene, M.; Adamo, C.; Cammi, R.; Ochterski, J. W.; Martin, R. L.; Morokuma, K.; Farkas, O.; Foresman, J. B.; Fox, D. J. Gaussian16 Revision A.01. 2016; Gaussian Inc. Wallingford CT.
- (16) Beck, A. D. Density-functional thermochemistry. III. The role of exact exchange. *J. Chem. Phys* **1993**, *98*, 5648–6.
- (17) Lee, C.; Yang, W.; Parr, R. G. Development of the Colle-Salvetti correlation-energy formula into a functional of the electron density. *Physical review B* **1988**, *37*, 785.
- (18) Barnard, T.; Hagan, H.; Tseng, S.; Sosso, G. C. Less may be more: an informed reflection on molecular descriptors for drug design and discovery. *Molecular Systems Design & Engineering* **2020**,
- (19) Hall, L. H.; Mohny, B.; Kier, L. B. The electrotopological state: structure information at the atomic level for molecular graphs. *Journal of chemical information and computer sciences* **1991**, *31*, 76–82.

- (20) Bertz, S. H. The first general index of molecular complexity. *Journal of the American Chemical Society* **1981**, *103*, 3599–3601.
- (21) Balaban, A. T. Highly discriminating distance-based topological index. *Chemical physics letters* **1982**, *89*, 399–404.
- (22) Hall, L. H.; Kier, L. B. The molecular connectivity chi indexes and kappa shape indexes in structure-property modeling. *Reviews in computational chemistry* **1991**, 367–422.
- (23) Labute, P. A widely applicable set of descriptors. *Journal of Molecular Graphics and Modelling* **2000**, *18*, 464–477.
- (24) Ertl, P.; Rohde, B.; Selzer, P. Fast calculation of molecular polar surface area as a sum of fragment-based contributions and its application to the prediction of drug transport properties. *Journal of medicinal chemistry* **2000**, *43*, 3714–3717.
